# Supplementary material
Source: Research Square preprint supplement (doi:10.21203/rs.3.rs-10292312/v1)
Supplement: Supplementary file 1 [file 7f279f950db3f6e0ad0ad496.docx]

**Supplementary Figure 1: All-Cause Mortality Subgroup Analysis**

**
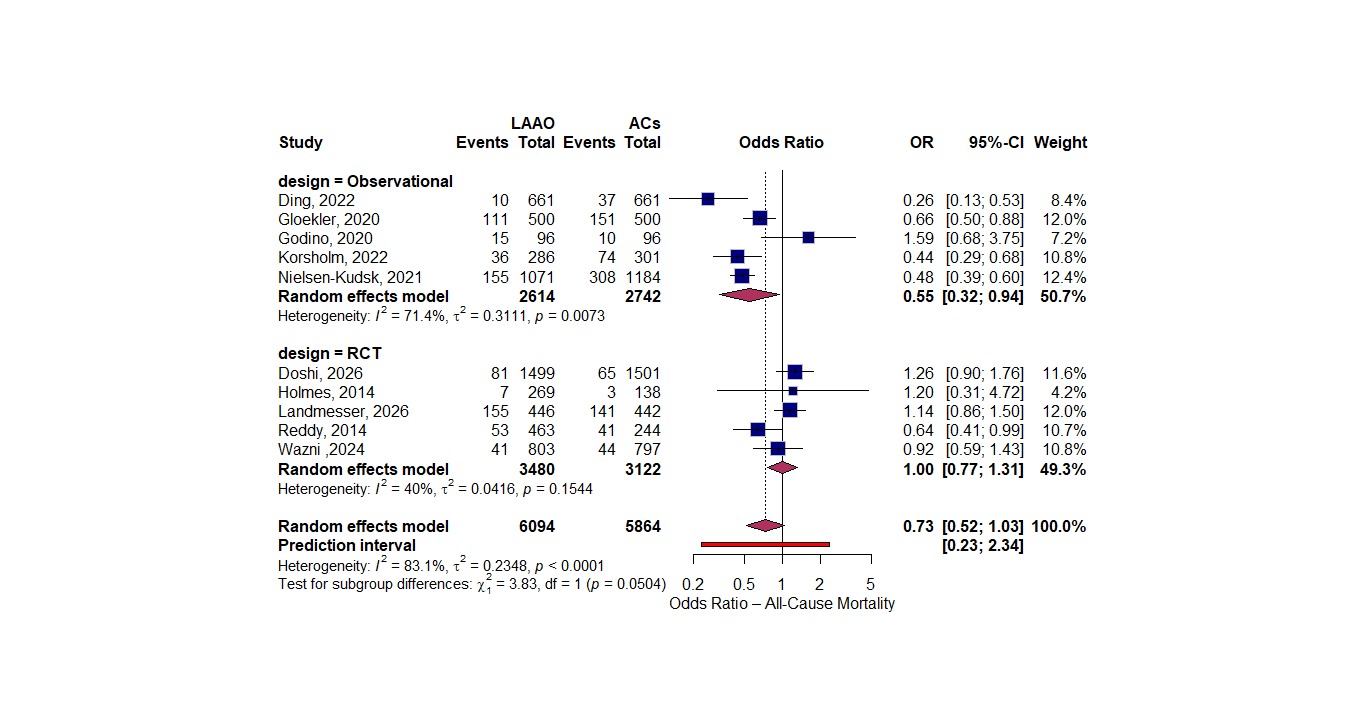
**

**Supplementary Figure 2: All-Cause Mortality Leave-One-Out Sensitivity Analysis**

**
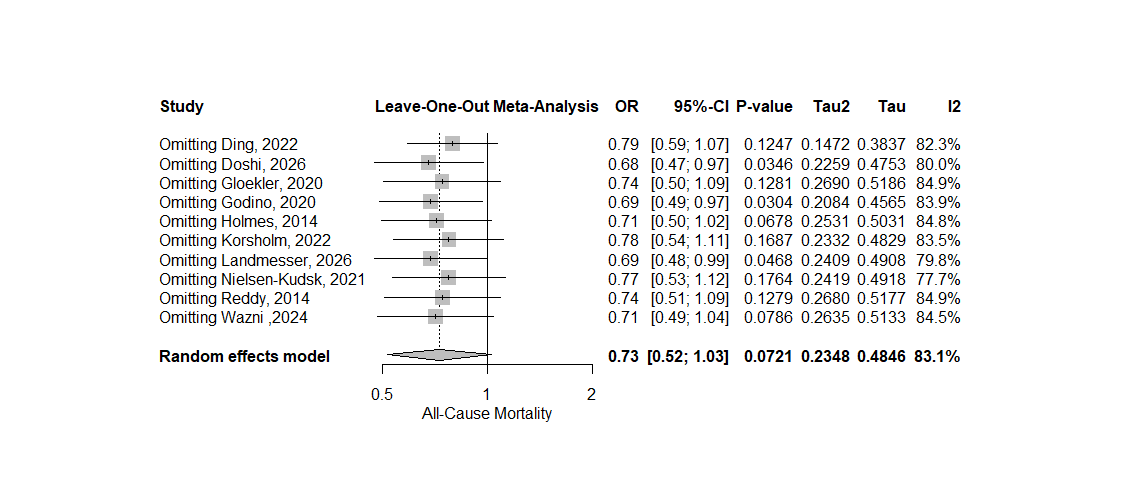
**

**Supplementary Figure 3: All-Cause Mortality Contour Enhanced Funnel Plot for Publication Bias Assessment**

**
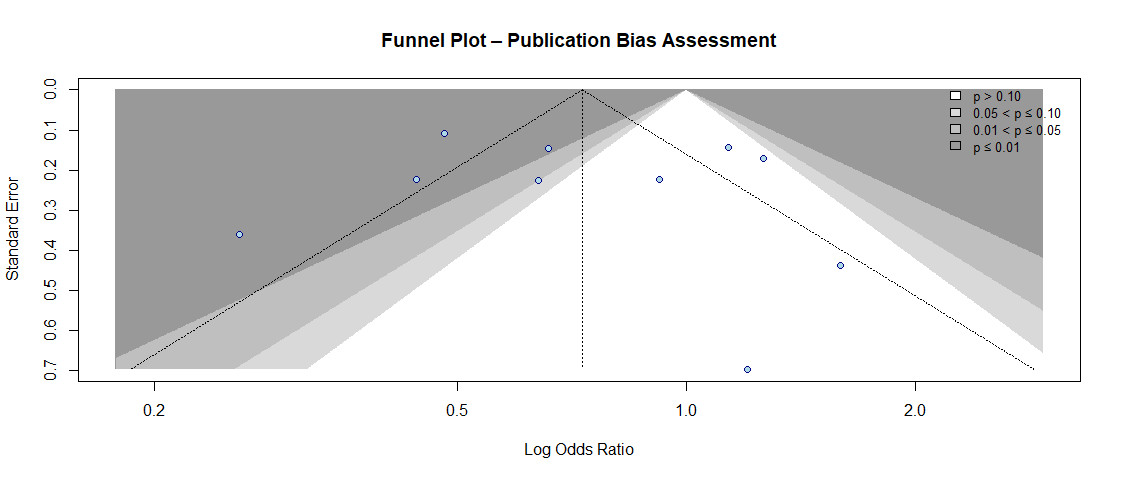
**

**Supplementary Figure 4: All-Cause Mortality Meta-Regression with Age Imbalance**

**
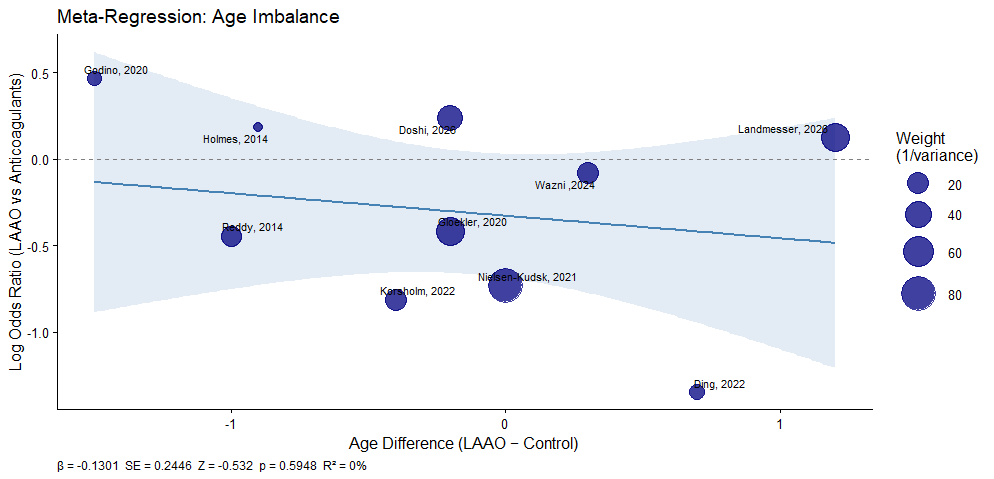
**

**Supplementary Figure 5: Bleeding Rate Subgroup Analysis**

**
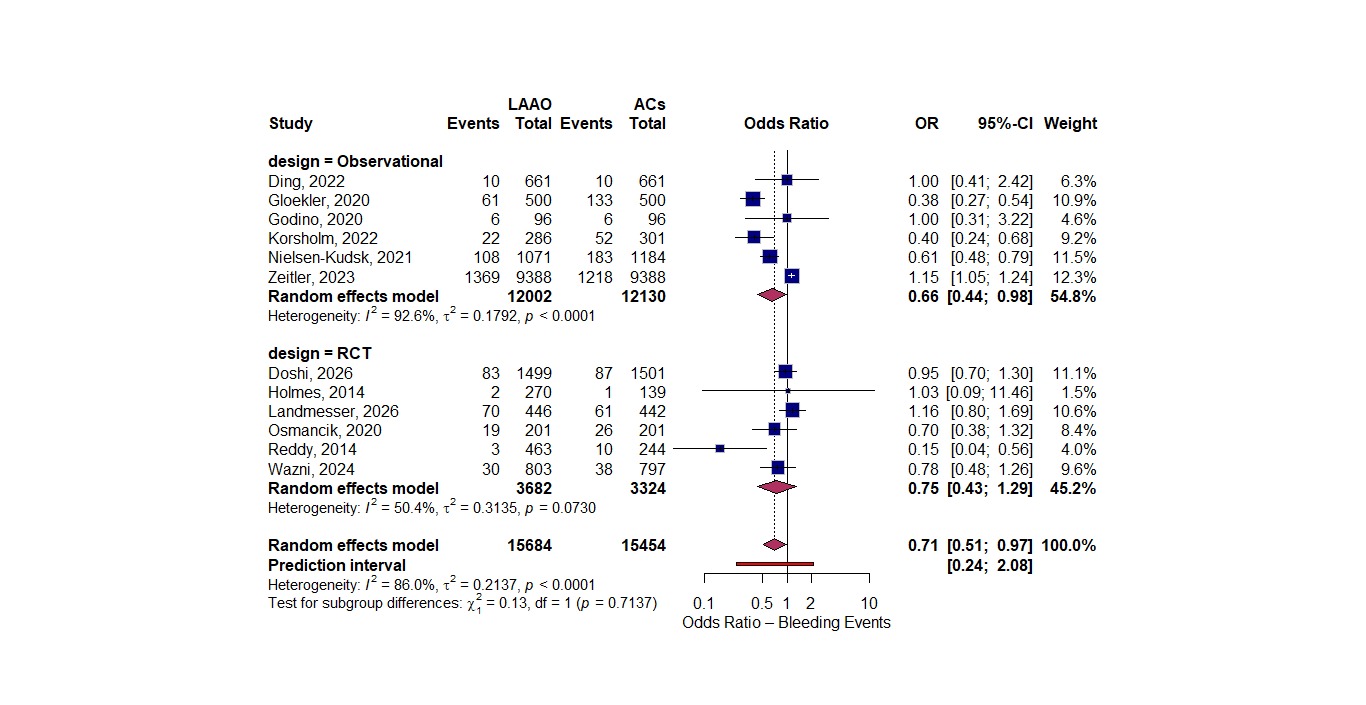
**

**Supplementary Figure 6: Bleeding Rate Leave-One-Out Sensitivity Analysis**

**
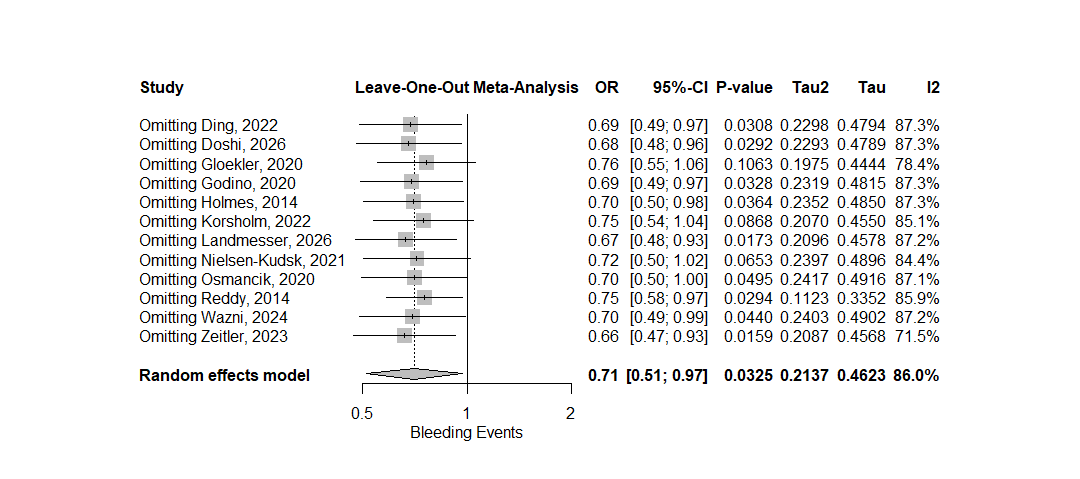
**

**Supplementary Figure 7: Bleeding Rate Contour Enhanced Funnel Plot for Publication Bias Assessment**

**
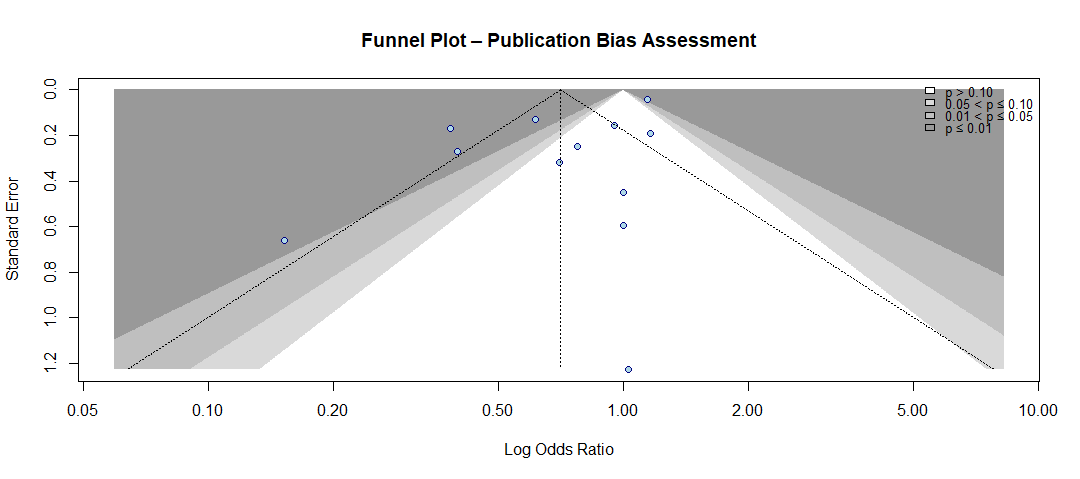
**

**Supplementary Figure 8: Bleeding Rate Meta-Regression with Age-Imbalance**

**
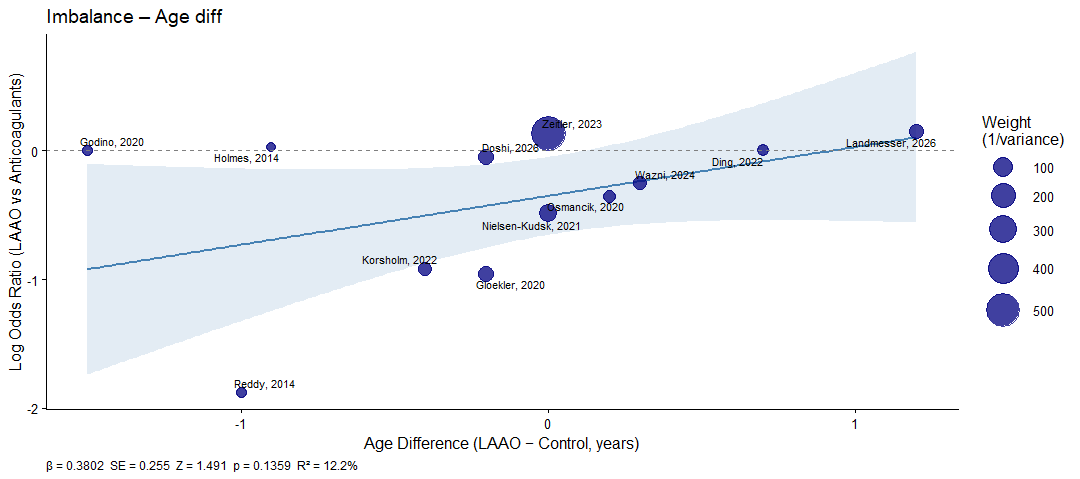
**

**Supplementary Figure 9: Cardiac Mortality Subgroup Analysis**

**
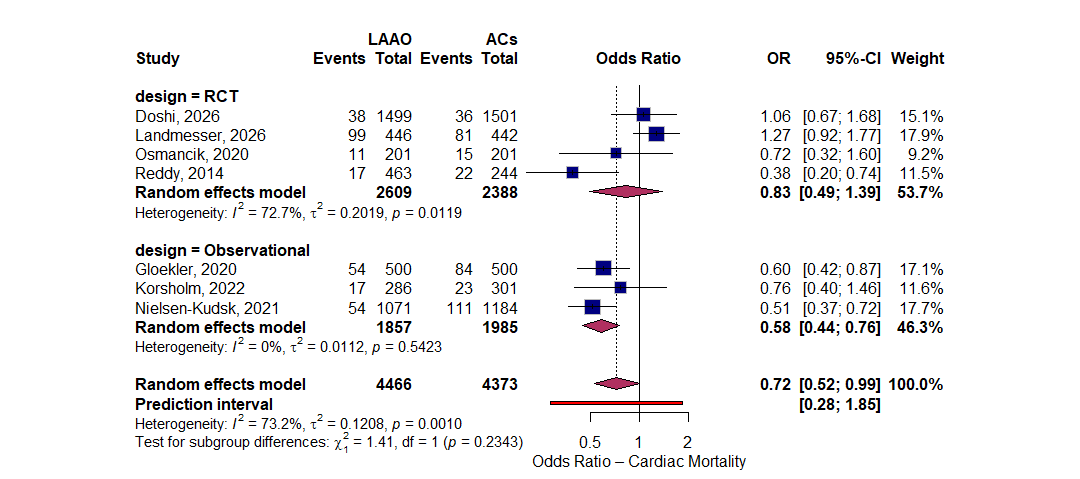
**

**Supplementary Figure 10: Cardiac Mortality Leave-One-Out Sensitivity Analysis**

**
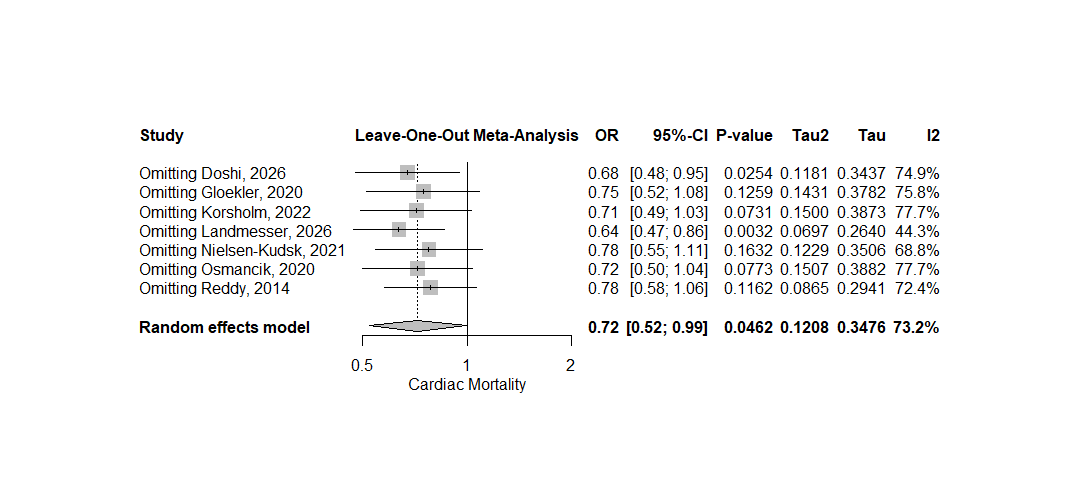
**

**Supplementary Figure 11: Systemic Thromboembolism Subgroup Analysis**

**
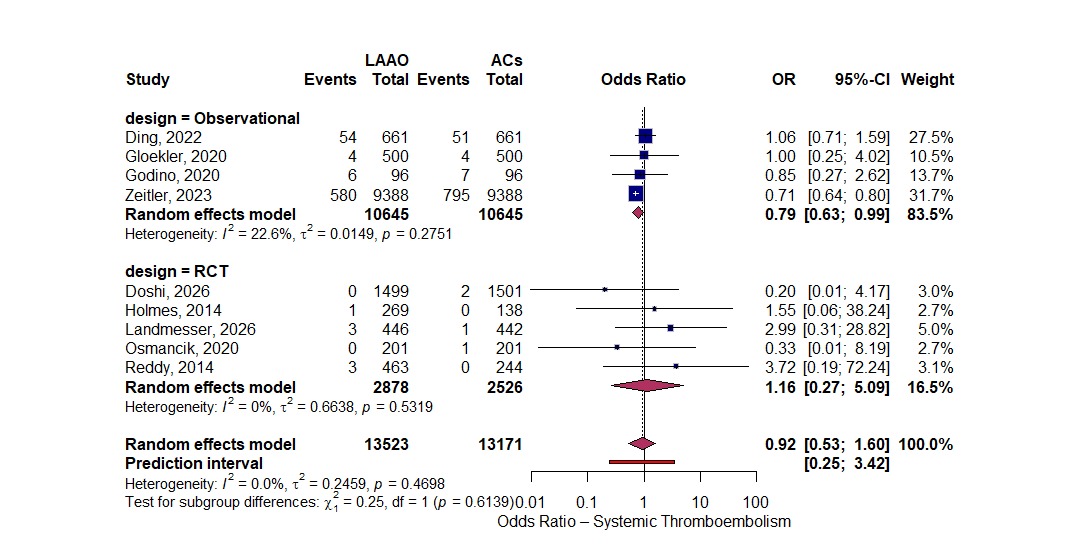
**

**Supplementary Figure 12: Systemic Thromboembolism Leave-One-Out Sensitivity Analysis**

**
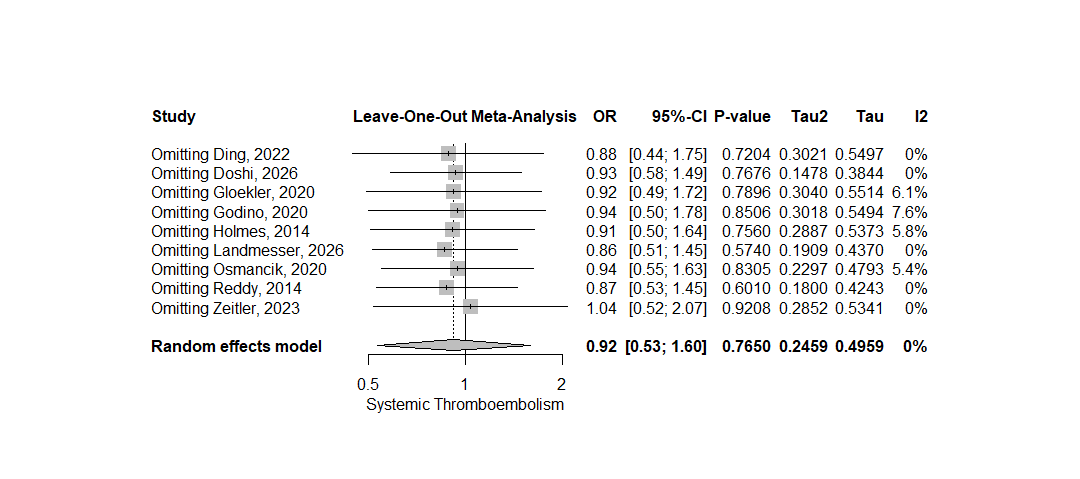
**

**Supplementary Figure 13: Systemic Thromboembolism Contour Enhanced Funnel Plot for Publication Bias Assessment**

**
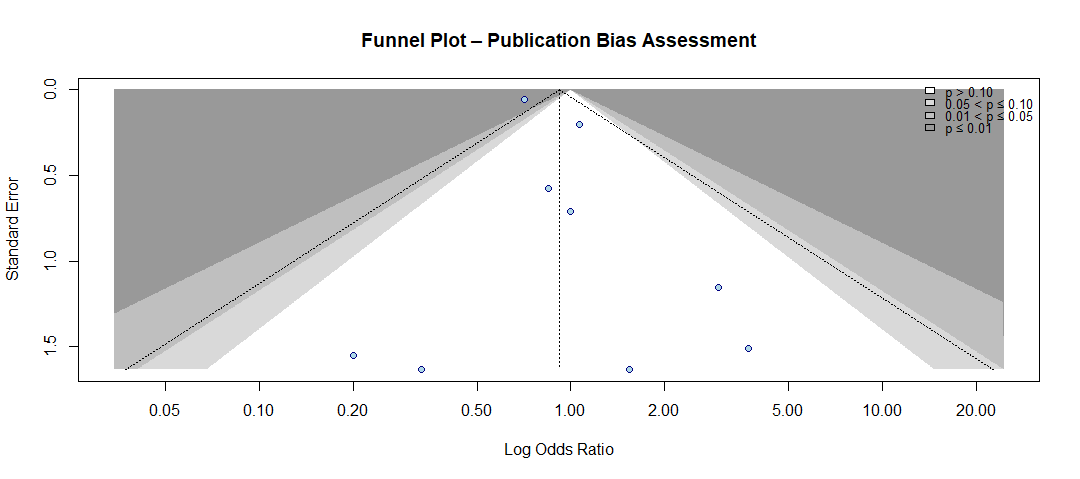
**

**Supplementary Figure 14: Stroke Subgroup Analysis**

**
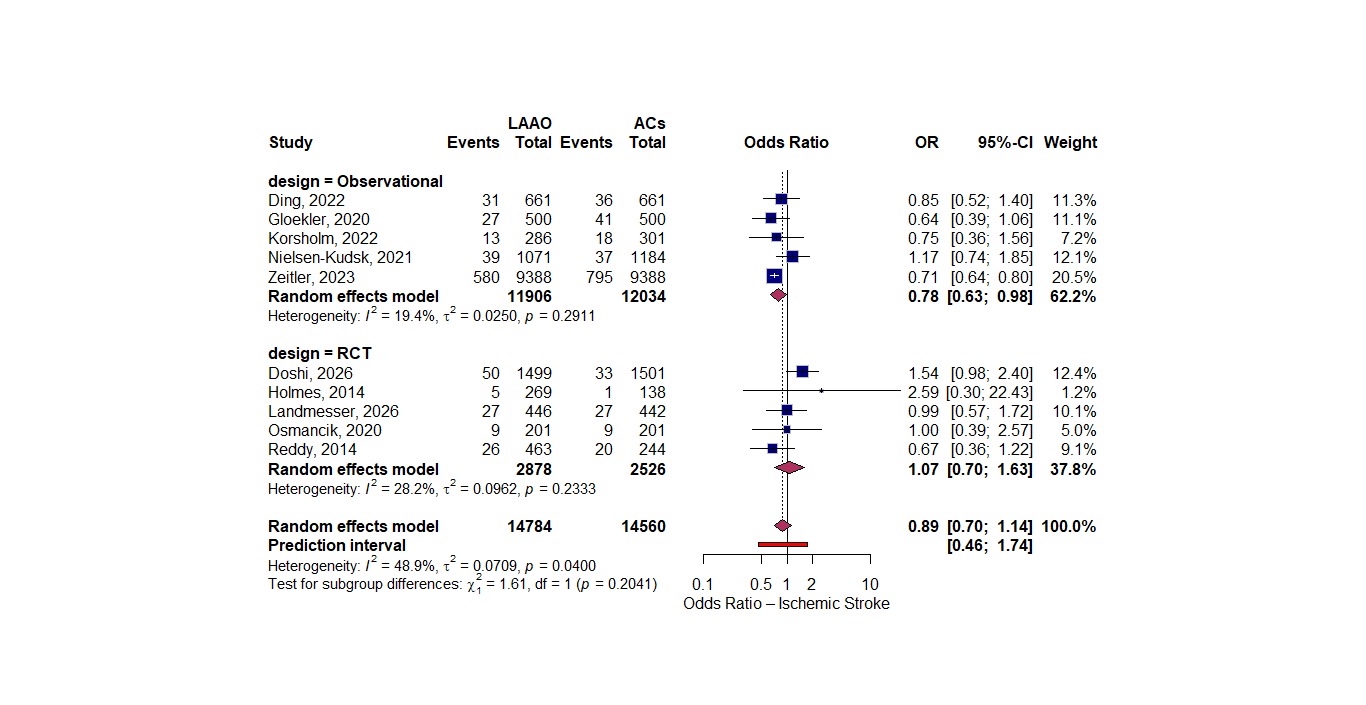
**

**Supplementary Figure 15: Stroke Leave-One-Out Sensitivity Analysis**

**
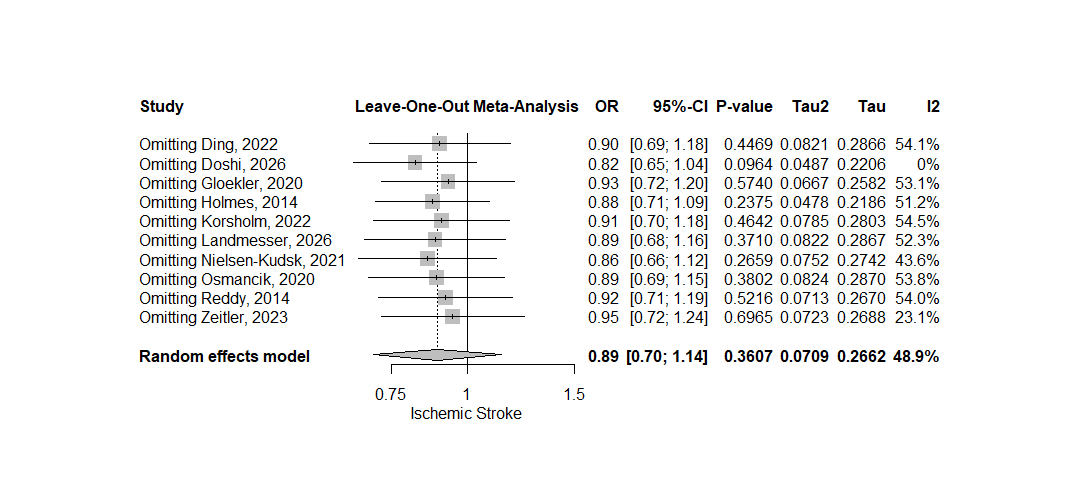
**

**Supplementary Figure 16: Stroke Contour Enhanced Funnel Plot for Publication Bias Assessment**

**
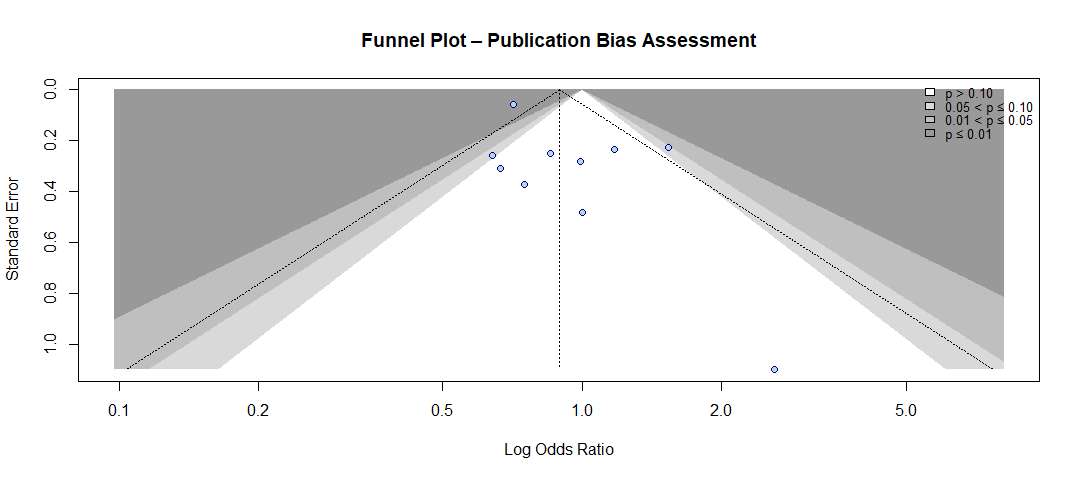
**

**Supplementary Figure 17: Stroke Meta-Regression with Age-Imbalance**

**
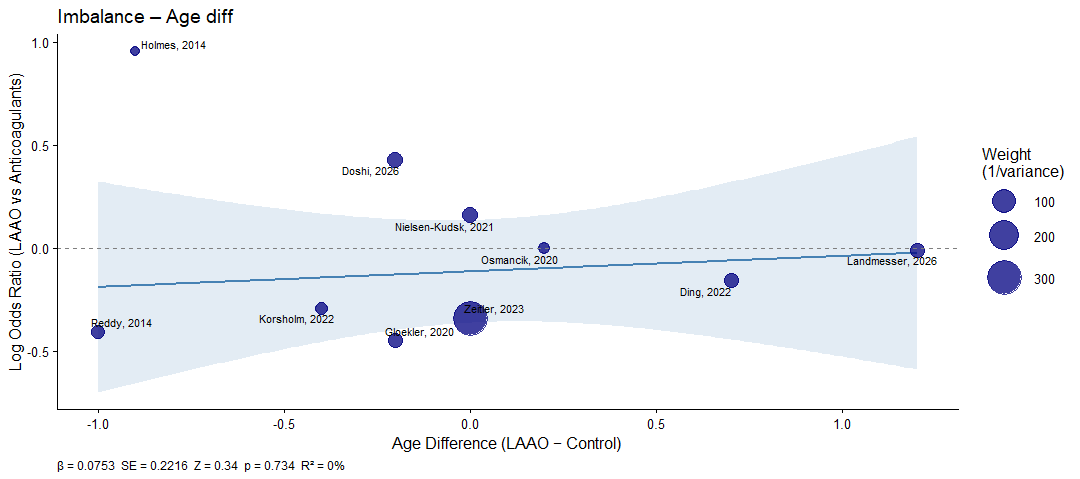
**

**Supplementary Figure 18: Risk of Bias in Randomized Studies via RoB2**

**
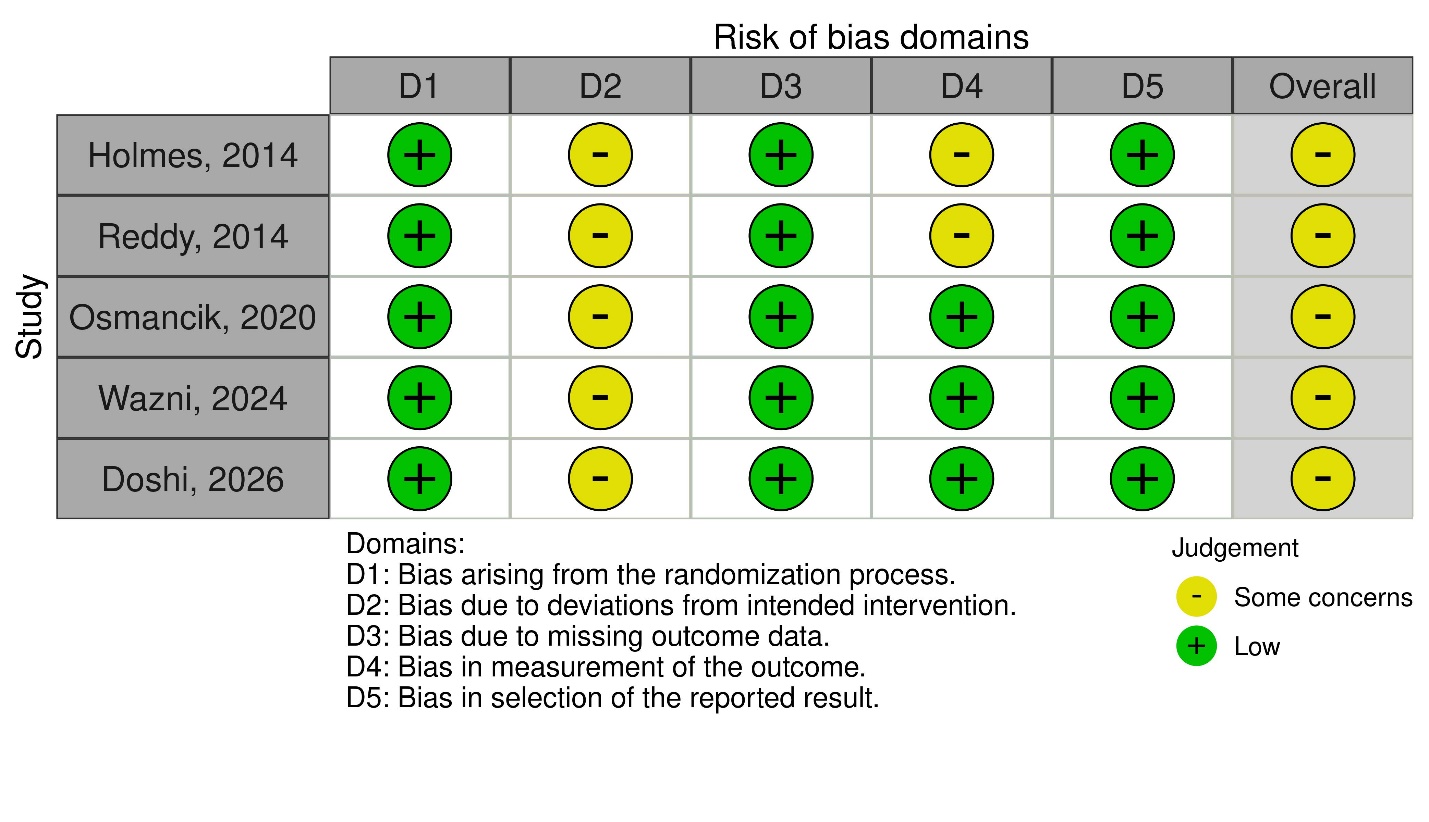
**

**
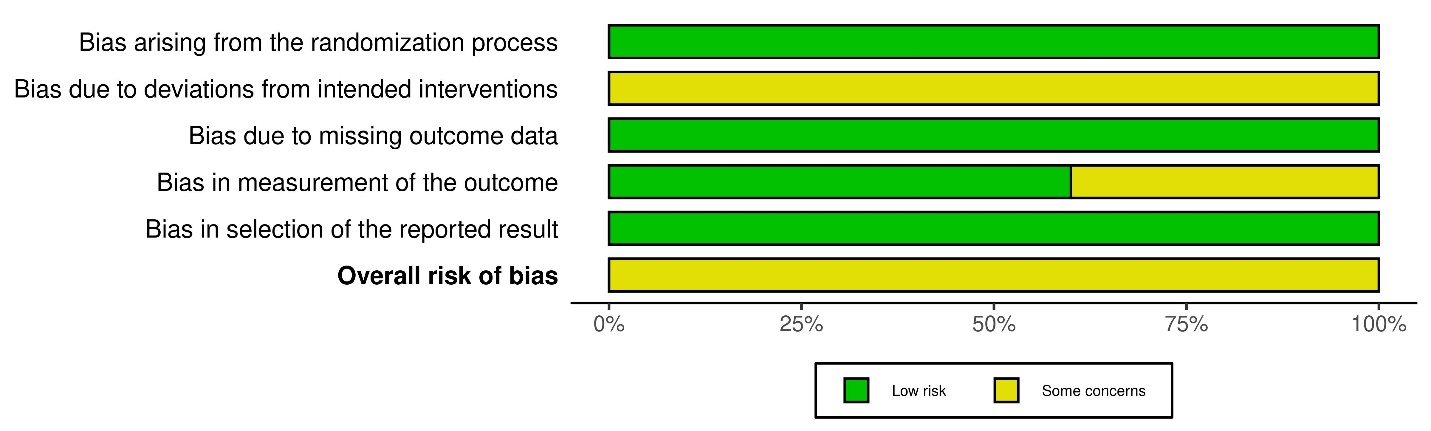
**

**Supplementary Figure 19: Risk of Bias in Non-Randomized Studies via ROBINS-I**

**
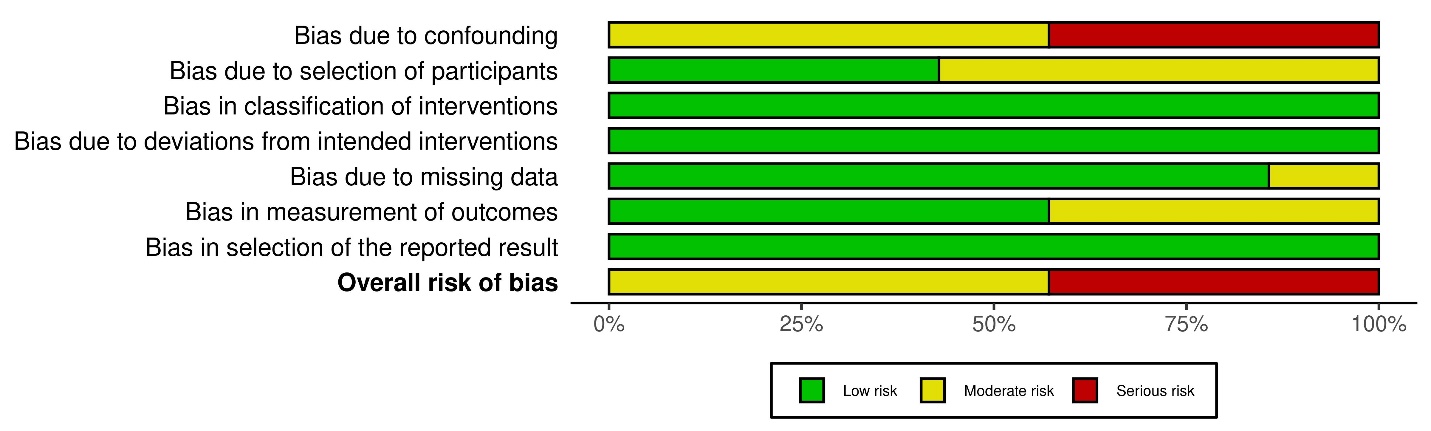

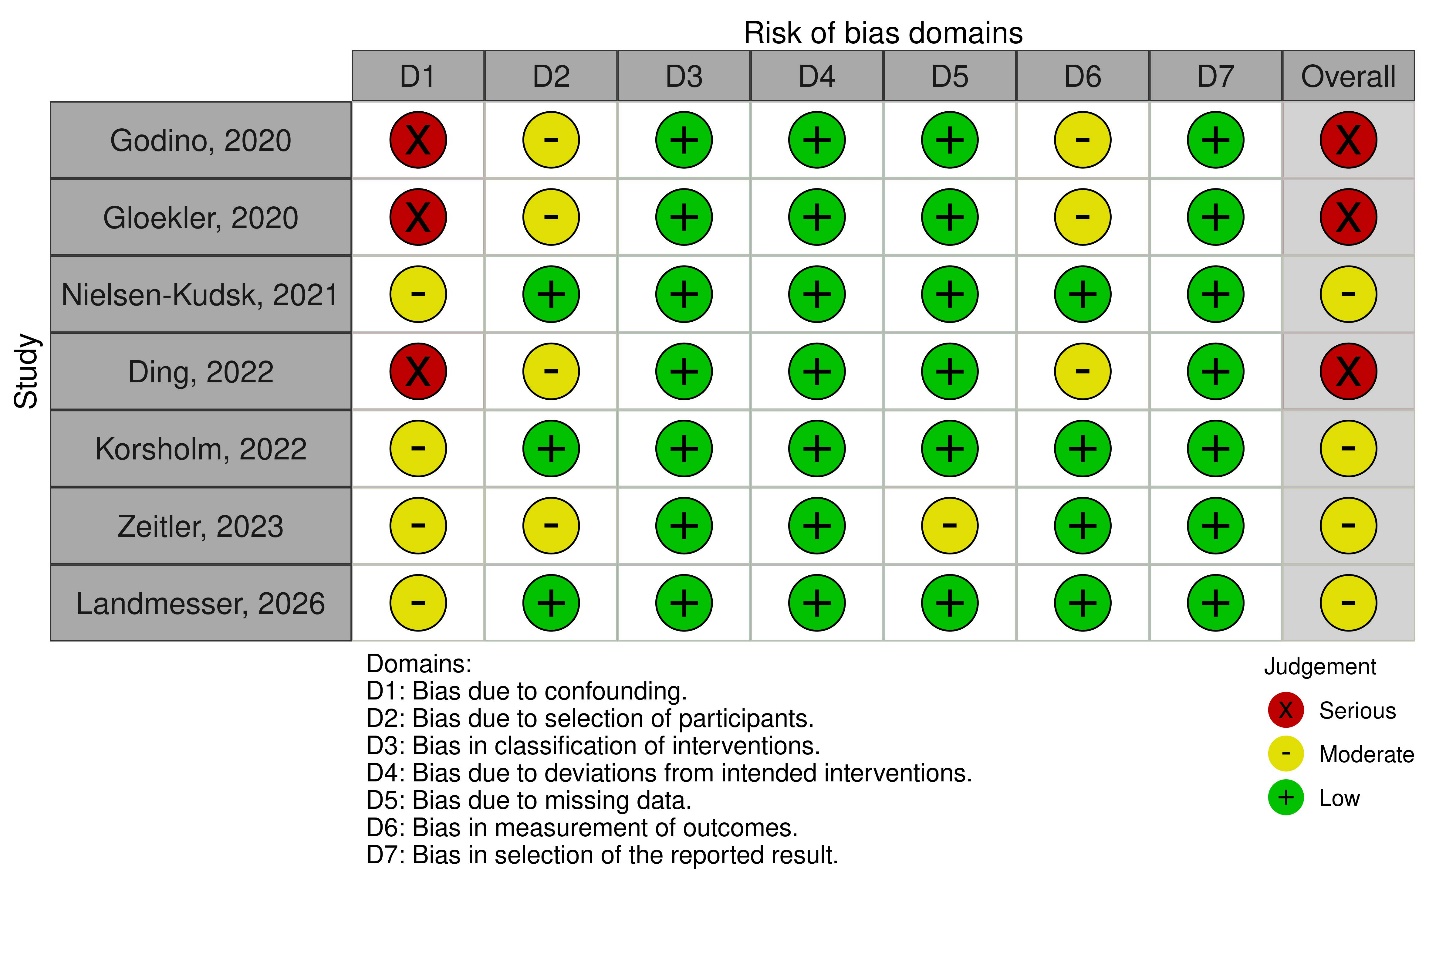
**

**Supplementary Figure 20. Search strategy table**

| Database | Search Strategy |
| --- | --- |
| PubMed | (("atrial fibrillation"[MeSH Terms] OR "atrial fibrillation"[tiab] OR "auricular fibrillation"[tiab] OR "AF"[tiab] OR "NVAF"[tiab]) AND ("left atrial appendage"[MeSH Terms] OR "left atrial appendage"[tiab] OR "left atrial appendage occlusion"[tiab] OR "left atrial appendage closure"[tiab] OR "LAAO"[tiab] OR "LAAC"[tiab] OR "LAA closure"[tiab] OR "LAA occlusion"[tiab] OR "LAA exclusion"[tiab] OR "Watchman"[tiab] OR "Amplatzer Amulet"[tiab] OR "Lariat"[tiab] OR "Lambyre"[tiab])) AND ("anticoagulants"[MeSH Terms] OR "anticoagulant*"[tiab] OR "oral anticoagulation"[tiab] OR "OAC"[tiab] OR "DOAC*"[tiab] OR "NOAC*"[tiab] OR "warfarin"[tiab] OR "vitamin K antagonist*"[tiab] OR "VKA"[tiab] OR "apixaban"[tiab] OR "rivaroxaban"[tiab] OR "dabigatran"[tiab] OR "edoxaban"[tiab]) |
| Embase | **#1** 'atrial fibrillation'/exp OR 'atrial fibrillation':ti,ab OR 'auricular fibrillation':ti,ab OR 'AF':ti,ab OR 'NVAF':ti,ab  **#2** 'left atrial appendage'/exp OR 'left atrial appendage occlusion':ti,ab OR 'left atrial appendage closure':ti,ab OR 'LAAO':ti,ab OR 'LAAC':ti,ab OR 'LAA closure':ti,ab OR 'LAA occlusion':ti,ab OR 'LAA exclusion':ti,ab OR 'Watchman':ti,ab OR 'Amplatzer Amulet':ti,ab OR 'Lariat':ti,ab OR 'Lambyre':ti,ab  **#3** 'anticoagulant agent'/exp OR 'anticoagulant*':ti,ab OR 'oral anticoagulation':ti,ab OR 'OAC':ti,ab OR 'DOAC*':ti,ab OR 'NOAC*':ti,ab OR 'warfarin':ti,ab OR 'vitamin K antagonist*':ti,ab OR 'VKA':ti,ab OR 'apixaban':ti,ab OR 'rivaroxaban':ti,ab OR 'dabigatran':ti,ab OR 'edoxaban':ti,ab  **#4** #1 AND #2 AND #3 |
| Cochrane CENTRAL | **#1** Atrial Fibrillation OR atrial fibrillation OR auricular fibrillation OR AF OR NVAF  **#2** Left Atrial Appendage OR left atrial appendage occlusion OR left atrial appendage closure OR LAAO OR LAAC OR LAA closure OR LAA occlusion OR LAA exclusion OR Watchman OR Amplatzer Amulet OR Lariat OR Lambyre  **#3** Anticoagulants OR anticoagulant* OR oral anticoagulation OR OAC OR DOAC* OR NOAC* OR warfarin OR vitamin K antagonist* OR VKA OR apixaban OR rivaroxaban OR dabigatran OR edoxaban  **#4** #1 AND #2 AND #3 |
